1 **Cavefish Increase Red Blood Cell Development and Reprogram Metabolism as**  
2 **Adaptations to Environmental Hypoxia**

3

4 Running Title: Cavefish erythrocytes and hypoxia

5

6 Corine M. van der Weele and William R. Jeffery

7

8 Department of Biology, University of Maryland, College Park, MD 20742 USA

9

10 Correspondence: [Jeffery@umd.edu](mailto:Jeffery@umd.edu)

11

12 Keywords

13

14 *Astyanax mexicanus*, cavefish, hypoxia, erythrocytes, hematopoiesis, metabolic  
15 reprogramming

16

17 Summary

18

19 *Astyanax mexicanus* cavefish adapt to life in hypoxic cave environments by  
20 evolving the capacity to increase red blood cell numbers during early development  
21 and reprogramming metabolism to favor anaerobic processes.

22

23

24

25

26

27

28

29

30

31

32 **Abstract**

33

34 The teleost *Astyanax mexicanus* is a single species with surface dwelling  
35 (surface fish) and cave dwelling (cavefish) morphs. Constructive and regressive  
36 traits have evolved in cavefish as adaptations for survival in perpetual darkness. In  
37 addition to darkness, cavefish must cope with de-oxygenated aquatic environments.  
38 Blood cell quantification and expression of hematopoietic marker genes indicated  
39 that cavefish have more erythrocytes than surface fish, and that this increase has a  
40 developmental basis. In contrast to zebrafish and other teleost embryos, in which  
41 erythrocyte formation is restricted to the posterior lateral mesoderm, the anterior  
42 as well as the posterior lateral mesoderm is involved in red blood cell formation in  
43 *Astyanax* embryos, and both of these hematopoietic domains are expanded in  
44 cavefish embryos. Erythroid development in the anterior mesoderm may be a pre-  
45 adaptation for surface fish to successfully colonize hypoxic cave environments. We  
46 also show that cavefish are less sensitive to phenylhydrazine-induced erythrocyte  
47 ablation than surface fish, suggesting a functional advantage of increased red blood  
48 cells. By mimicking a hypoxic cave environment in the laboratory, we further  
49 demonstrate that cavefish respond to hypoxia differently than surface fish. Surface  
50 fish with fewer red blood cells use overall metabolic depression to counteract  
51 hypoxia, whereas cavefish with larger numbers of erythrocytes respond to hypoxia  
52 by switching to anaerobic metabolism. These results suggest that cavefish may have  
53 adapted to hypoxic environments by enhancing the capacity to form erythrocytes  
54 and reprogramming metabolism.

55

56

57

58

59

60

61

62

## 63 **Introduction**

64

65 It is critical to know how organisms adapt to novel environments in order to  
66 understand evolution. We study evolution in the Mexican tetra *Astyanax mexicanus*,  
67 a single species consisting of surface-dwelling (surface fish) and cave-dwelling  
68 (cavefish) morphs. Surface fish colonized subterranean waters in the Sierra de El  
69 Abra region of Mexico (Mitchell et al., 1977; Gross, 2012) during the late Pleistocene  
70 (Fumey et al., 2018; Herman et al., 2018), and their cavefish descendants evolved  
71 numerous traits adapting them for life in perpetual darkness. Cavefish adaptations  
72 include constructive traits, such as more taste buds and cranial neuromasts,  
73 increased olfactory capacity, and fat deposits, which facilitate feeding and survival  
74 during times of low food input, and regressive traits, such as decreased metabolic  
75 rates and loss of eyes, which may be important in energy conservation (Yamamoto  
76 et al., 2004; Moran et al., 2014; 2015, Varatharasan et al., 2009; Espinasa et al., 2014;  
77 Yoshizawa et al., 2014; Hüppop, 1986; Xiong et al., 2018). Although the unifying  
78 theme of cave habitats is complete darkness and the absence of primary  
79 productivity (Culver and Pipan, 2009), measurements of abiotic factors indicate that  
80 there are additional environmental constraints: caves often contain groundwater  
81 severely depleted in oxygen (Malard and Hervant, 1999). For example, oxygen  
82 reductions of 50% or more have been measured in Tinaja and Pachón Caves in the  
83 Mexican Sierra de El Abra (Rohner et al., 2013, Ornelas-Garcia et al., 2018),  
84 suggesting that hypoxia could be an important driver of evolutionary changes in  
85 *Astyanax* cavefish. However, little is known about how cavefish have adapted to  
86 hypo-oxygenated waters.

87 In vertebrates, oxygen is bound to hemoglobin and transported through the  
88 body by red blood cells. Increasing erythrocyte production is a well-documented  
89 strategy for coping with hypoxia at high altitude (Haas, 2013), but the role of red  
90 blood cells in adaptation to hypoxic caves is unknown. Hematopoiesis, the process  
91 in which erythrocytes and other blood cells are formed during embryogenesis,  
92 occurs in two waves in vertebrates: the primitive and definitive waves (Davidson  
93 and Zon, 2004; Paik and Zon, 2010). In zebrafish and other teleost embryos, the

94 first or primitive wave occurs in anterior and posterior lateral mesoderm beginning  
95 during the tailbud stage. However, different hematopoietic cell types are produced  
96 anteriorly and posteriorly. The anterior lateral mesoderm (ALM) undergoes  
97 myelopoiesis to form macrophages, and some of these later differentiate into  
98 neutrophils and microglia (Herbomel et al., 1999; Herbomel et al., 2001; Le Guyader  
99 et al., 2008), whereas the posterior lateral mesoderm (PLM) undergoes  
100 erythropoiesis to form primitive erythrocytes. Subsequently, the PLM converges  
101 into the intermediate cell mass, where the precursors of endothelial cells lining the  
102 first blood vessels, primitive erythrocytes, and myeloid cells will ultimately  
103 differentiate. The second or definitive wave of hematopoiesis begins later in  
104 development when hematopoietic stem and progenitor cells are formed in the  
105 aorta-gonad-mesonephros (AGM), and these cells seed the caudal hematopoietic  
106 tissue and form the posterior blood islands, where definitive erythrocytes begin to  
107 differentiate (Paik and Zon 2010; Gore et al., 2018). Eventually, definitive  
108 hematopoiesis moves to the thymus and head kidneys in adults. The primitive and  
109 definitive waves of hematopoiesis are potential targets for adaptive changes  
110 induced by hypoxia.

111 Hematopoiesis is directed by a series of developmental-stage specific  
112 transcription factors producing different types of blood cells (Davidson and Zon,  
113 2004; Carroll and North, 2014). For example, the *growth factor independence 1*  
114 (*gfi1*) gene, which encodes a transcriptional repressor, is important for primitive  
115 hematopoiesis at several developmental stages (Wei et al., 2008; Cooney et al., 2013;  
116 Moore et al., 2018). In mice *gfi1* has been shown to regulate many different genes  
117 through chromatin modification (Möröy et al., 2015). Expression of the zebrafish  
118 homolog *gfi1aa* occurs throughout the period of embryonic segmentation, first in  
119 the PLM, then in the intermediate cell mass, and finally in the AGM (Wei et al., 2008,  
120 Cooney et al., 2013), where it directs the development of hemogenic endothelia into  
121 hematopoietic stem and progenitor cells, which ultimately differentiate into red  
122 blood cells (Moore et al., 2018). *Gfi1aa* is also expressed in the ALM, albeit weakly  
123 and only for a short time (Wei et al., 2008). The expression of *gfi1aa* and other

124 hematopoietic genes during both waves of hematopoiesis provide excellent markers  
125 for studying early red blood cell development.

126 Oxygen is required in aerobic organisms to produce energy, and insufficient  
127 oxygen leads to the activation of an evolutionarily conserved transcriptional  
128 response (Majmundar et al., 2010). The responses to oxygen deprivation are  
129 coordinated by activation of the hypoxia inducible factors (HIFs), a family of  
130 transcription factors controlling a large number of downstream target genes  
131 involved in promoting many different responses to hypoxia (Haase, 2013). HIFs  
132 function in metabolic tissue homeostasis, balancing oxygen consumption, Reactive  
133 Oxygen Species (ROS) production, and generation of NAD<sup>+</sup> by activating  
134 transcription of target genes central to reprogramming a metabolic shift (Wheaton  
135 and Chandel, 2011). *Astyanax* cavefish (Hüppop, 1986; Moran et al., 2014, Aspiras  
136 et al., 2015) and other cave-adapted animals (Bishop et al., 2004) have evolved  
137 reduced metabolic rates to conserve energy in the cave environment. However, it is  
138 unknown whether metabolic changes in cavefish include a switch from aerobic to  
139 anaerobic metabolism as a consequence of the hypoxic environment.

140 In the present investigation, comparison of *Astyanax* morphs revealed that  
141 cavefish embryos develop significantly more erythrocytes than surface fish, and that  
142 this increase is mediated by the expansion of primitive hematopoietic domains into  
143 the ALM of cavefish embryos. Although minor compared to cavefish, red blood cell  
144 formation was also noted in the surface fish ALM, suggesting the potential  
145 importance of erythrocyte enhancement for colonization of hypoxic cave  
146 environments. Our results also revealed a stronger response to laboratory-induced  
147 hypoxia in cavefish than surface fish, which involves upregulation of HIF dependent  
148 genes and metabolic genes, signaling a switch from oxygen dependent processes to  
149 glycolysis and fermentation. These studies suggest that hypoxia may be one of the  
150 driving forces of adaptive evolution in cavefish.

151

152

153

154

155 **Materials and methods**

156

157 *Biological materials*

158 *Astyanax mexicanus* surface fish and cavefish were obtained from laboratory  
159 stocks descended from collections in Balmorhea Springs State Park, Texas and  
160 Cueva de El Pachón, Tamaulipas, Mexico respectively. Fish were raised in a constant  
161 flow culture system as described previously (Jeffery et. al. 2000). Embryos were  
162 obtained by natural spawning and reared at 23°C. Fish handling and husbandry  
163 protocols were approved by the University of Maryland Animal Care and Use  
164 Committee (IACUC #R-NOV-18-59) (Project 1241065-1), and conformed to National  
165 Institutes of Health guidelines.

166

167 *Quantification of circulating blood cells*

168 Developing larvae were immobilized at 36-40 hours post-fertilization (hpf)  
169 with 2 µg ml<sup>-1</sup> tricaine (Western Chemical, Inc, Ferndale, WA, USA) and placed in  
170 water on a concave microscope slide. Blood flow was imaged for 10 seconds using a  
171 stereoscope (Olympus SZX12) with 50x magnification and a 5 MP, Color, AmScope  
172 Microscope Eyepiece Camera (MD500). Recordings were captured with Photobooth  
173 on a Macbook computer via USB (OS 10.13.6). Videos were rendered into separate  
174 frames in Adobe Photoshop (CC2017, Adobe Inc., San Jose, CA, USA) and processed  
175 and analyzed in Fiji (Schindelin et al., 2012). After conversion to 32 bit, a data image  
176 showing the movement of particles was created by subtracting two frames 0.15  
177 seconds apart. This data image was used in the plugin TrackMate (Tinevez et al.,  
178 2017) to analyze the number of moving blood cells in a region of interest (ROI)  
179 covering 50% or more of the blood stream over the yolk (150x150 pixels). Using the  
180 LoG detector, moving blood cells were automatically detected by setting the “blob  
181 diameter” to 5 and the threshold to 2. An automatic quality threshold was used to  
182 obtain the number of circulating blood cells and checked against the recording for  
183 accuracy.

184

185 *Red blood cell staining*

186 Red blood cells were stained with 0.6 mg ml<sup>-1</sup> o-dianisidine (Sigma-Aldrich,  
187 St. Louis, MO, USA), 0.01 M sodium acetate pH 4.5, 0.65 % H<sub>2</sub>O<sub>2</sub> for 15 min in the  
188 dark (Iuchi and Yamamoto, 1983). The stained embryos were rinsed in phosphate  
189 buffered saline (PBS), fixed in 4% paraformaldehyde (PFA), and imaged as  
190 described below for *in situ* hybridization.

191

192 *In situ hybridization*

193 Genes were cloned from a 24 hpf surface fish cDNA library and 10 hpf, 24 hpf  
194 and 30 hpf cavefish cDNA libraries using the pCRII TOPO dual promoter vector  
195 (ThermoFisher Scientific, Waltham, MA, USA) and the following primers: *hbb2* (24  
196 hpf SF; ENSAMXG00000031275: 5'-gcaggacaagtagaaacctcaaagtc-3' and 5'-  
197 tttcgttaagggcagagcctaca-3'), *gfi1aa* (24 hpf CF; ENSAMXG00000006669: 5'-  
198 gaaggtctgcgctcgtgatatt-3' and 5'-agttatccgcggtgtgaacag-3'), *lcp1* (36 hpf CF;  
199 ENSAMXG00000012855: 5'-aggccttcagcaaagttgatgtg-3' and 5'-  
200 ttcaggtcctctgcaccgatatt-3'), *lmo2* (10 hpf CF; ENSAMXG00000032986: 5'-  
201 ggcctctacaatcgagaggaaa-3' and 5' taccaagttgccgttagttgg-3'). DIG labeled probes  
202 were made using SP6 or T7 transcription kits (Roche, Mannheim, Germany) from  
203 linearized plasmid or, in the case of *gfi1aa*, from a PCR product made with the  
204 cloned cDNA as template and the above mentioned primers, after a RNA-polymerase  
205 promoter site was added to the 5' end.

206 *In situ* hybridizations were performed as previously described (Ma et al.,  
207 2014). Briefly, stored (-20°C) 4% PFA fixed and methanol dehydrated embryos were  
208 rehydrated into PBS stepwise, fixed with 4% PFA, digested with proteinase K, fixed  
209 with 4% PFA, and hybridized with probes at 60°C for 16 hours. Un-hybridized probe  
210 was removed by SSCT stringency washes followed by incubation in MABT blocking  
211 solution (Roche) and subsequently with anti-DIG-AP Fab fragments (Roche).  
212 Embryos were thoroughly rinsed in MABT buffer and PBS, equilibrated in AP buffer,  
213 and stained with BM-Purple (Roche). The stained embryos were imaged and  
214 photographed on a Zeiss Discovery V20 stereoscope with a Zeiss AxioCam HRc  
215 camera.

216

217 *Quantitative real time polymerase chain reaction*

218 RNA was extracted from 30 embryos with Trizol (ThermoFisher) and treated  
219 with RNase-free DNase I (ThermoFisher). The DNase I reaction was stopped, and  
220 the RNA was cleaned and concentrated by phenol/chloroform extraction and  
221 precipitated by ammonium acetate and ethanol. Poly(A)-primed cDNA was made  
222 with SuperScript III First Strand Synthesis SuperMix (ThermoFisher) and used in  
223 quantitative real time polymerase chain reaction (qPCR) with Takara SYBR Premix  
224 Ex Taq (Tli RNaseH Plus) (Takara Bio USA Inc., Mountain View, CA, USA) and LC480  
225 (Roche). The *rpl13a* gene was used as a reference gene. The primers used in qPCR  
226 analysis are shown in (Table 1).

227 For surface and cavefish comparisons,  $\Delta Ct$  for each gene was calculated by  
228 subtracting the average Ct value of the reference gene *rpl13a*. For comparison of  
229 gene expression in cavefish to surface fish at different time points,  $\Delta\Delta Ct$  was  
230 calculated by subtracting the average  $\Delta Ct$  of surface fish from each  $\Delta Ct$  of cavefish.  
231  $\Delta\Delta Ct$  values for cavefish compared to surface fish for different time points were then  
232 used for comparison between time points. Statistical analysis was done for each  
233 gene using a one-way ANOVA followed by pairwise comparison with Tukey HSD  
234 (N=3)( $p < 0.05$ ).

235 For comparison of gene expression between hypoxia to normoxia,  $\Delta\Delta Ct$   
236 values were calculated by subtracting the average  $\Delta Ct$  at normoxia from each  $\Delta Ct$  at  
237 hypoxia for cavefish and surface fish. These  $\Delta\Delta Ct$  values were then compared  
238 between cavefish and surface fish with a Student's t-test for each gene, and  
239 significance was determined for an overall value of  $p < 0.05$  using the Bonferroni  
240 correction (8 genes;  $p_{\text{adjusted}} < 0.0063$ ) (N=3) (Rosenthal and Rosnow, 1991). For  
241 graphical representation, the fold change was calculated as  $2^{-(\Delta\Delta Ct)}$ , where values  $> 1$   
242 show an increase and values  $< 1$  a decrease. Variation was expressed as the range of  
243 fold change  $2^{-(\Delta\Delta Ct + \text{stdev}\Delta\Delta Ct)}$  for the upper value or  $2^{-(\Delta\Delta Ct - \text{stdev}\Delta\Delta Ct)}$  for the lowest value.

244

245 *Red blood cell ablation with phenylhydrazine*



246           Phenylhydrazine (PHZ; Sigma-Aldrich, St. Louis, MO, USA) was used to ablate  
247 red blood cells (Houston et al., 1988). At 12 hpf, 20 embryos were placed in clean  
248 fish system-water containing a particular concentration of PHZ or clean fish system  
249 water as a control. Embryos were incubated with PHZ for 28 hours when blood  
250 circulation became visible over the yolk. Embryos were fixed and used for *in situ*  
251 hybridization with a *hbb2* probe or live video imaging. Measurements of tail length  
252 were made in Fiji and differences tested with a two-way ANOVA ( $p < 0.05$ ), ( $N = 10$ )  
253 and Tukey-Kramer for individual comparisons ( $p < 0.05$ ). Quantification of red blood  
254 cells was done as described above, and the reductions expressed as percent of the  
255 average of the untreated specimens. Differences were tested with a two-way  
256 ANOVA, ( $p < 0.05$ ), ( $N = 10$ ) and Tukey HSD.

257

#### 258 *Laboratory emulation of a low oxygen cave environment*

259           Oxygen was reduced by heating clean fish system water and pouring it into a  
260 60cm long, 0.9 cm diameter plastic tube (Tygon® S3™ B-44-4X Food, Milk and  
261 Dairy Tubing, United States Plastic Corp., Lima, OH, USA). The water was 50°C at  
262 time of capping, which equates to about a 50% reduction in oxygen (Benson et al.,  
263 1979). The tubes were cooled to room temperature, 40 embryos in 0.5 ml of  
264 normoxic water were placed inside each tube within 30 seconds after removing the  
265 caps, and the tubes were re-capped airtight with silicone stoppers (Versilic®  
266 Silicone Stoppers, United States Plastic Corp.). Because of the low diameter to  
267 length ratio of the tube, oxygen diffusion back into the water was minimal.

268           Embryos were exposed to low oxygen by incubating the plastic tubes at 23°C  
269 for 22 hours beginning at 16 hpf. After removal from the tubes, embryos were  
270 assayed for morphological changes, and the number of blood cells was quantified as  
271 described ( $N = 8$  for each morph). For extraction of RNA, embryos were exposed to  
272 hypoxia and transferred into 1 ml of Trizol within 3 min after being removed from  
273 the tubes. As controls, normoxic conditions were created by filling tubes with water  
274 at room temperature, placing embryos in the tubes, and capping the tubes.

## 275 **Results**

276

277 *Cavefish have more erythrocytes than surface fish*

278 To test the possibility that cavefish cope with hypoxic environments by  
279 producing more red blood cells, we compared erythrocytes between surface fish  
280 and cavefish larvae in several different ways. First, we conducted direct  
281 observations of blood cell numbers. The circulatory system is still partially open  
282 when blood begins to circulate at about 34 hpf, permitting blood cells to be imaged  
283 as they flow from the posterior cardinal vein over the surface of the yolk mass  
284 toward the heart (Fig. 1A-D). The number of circulating blood cells was quantified  
285 in this region in sequential video frames using Fiji image analysis software. This  
286 quantification revealed about twice as many circulating blood cells in cavefish as in  
287 surface fish (Fig. 1B-E). Second, we compared erythrocytes in surface fish and  
288 cavefish by determining the expression of *hemoglobin subunit beta-2-like (hbb2)*  
289 using *in situ* hybridization, and *hbbe2*, an *Astyanax* embryonic  $\beta$ -hemoglobin most  
290 similar to zebrafish *hbbe*, for qPCR (Ganis et al., 2012) (Fig. 1F-H). *In situ*  
291 hybridization showed more *hbb2* staining in cavefish compared to surface fish,  
292 which was especially evident in the anterior yolk mass at 36 hpf (Fig. 1F), and *hbb2*  
293 staining was also more extensive in the posterior region of cavefish larvae at 84 hpf  
294 (Fig. 1G). The qPCR results showed increased *hbbe2* mRNA levels in cavefish  
295 compared to surface fish at 10 and 24 hpf, and particularly high differences were  
296 detected at 10 hpf, near the beginning of primitive hematopoiesis (see also below)  
297 (Fig. 1H). Third, we evaluated expression of the *gfi1aa* gene, which encodes a  
298 transcription factor essential for hematopoiesis (Cooney et al., 2013), by qPCR (and  
299 *in situ* hybridization; see below) during surface fish and cavefish development. The  
300 results showed increased *gfi1aa* mRNA levels in cavefish compared to surface fish at  
301 24 hpf (Fig. 1H), near the beginning of definitive hematopoiesis. These results  
302 provide three complementary lines of evidence supporting the enhancement of red  
303 blood cells in cavefish.

304

305 *Expansion of erythropoietic domains in cavefish embryos*

306 To understand the developmental basis of erythrocyte increase in cavefish,  
307 we compared the timing and spatial expression of *hbb2*, *gfi1aa*, and other

308 hematopoiesis marker genes by *in situ* hybridization during surface fish and  
309 cavefish embryogenesis.

310 As in zebrafish (Brownlie et al., 2003; Wei et al., 2008), *hbb2* and *gif1aa* were  
311 initially expressed in the intermediate cell mass of the posterior lateral mesoderm  
312 (PLM) in *Astyanax* surface fish and cavefish embryos during primitive  
313 hematopoiesis, and expression subsequently progressed to the posterior blood  
314 islands (Fig 2A, C). We also detected *gif1aa* expression in the anterior lateral  
315 mesoderm (ALM) (Wei et al., 2008), but in striking contrast to zebrafish, in which  $\beta$ -  
316 hemoglobin expression and erythropoiesis are restricted to the PLM, *gif1aa* and  
317 *hbb2* staining were also detected in the ALM in both surface fish and cavefish  
318 embryos (Fig 2A). Furthermore, *gif1aa* and *hbb2* staining in the ALM and PLM at 14  
319 hpf and in the aorta-gonad-mesonephros (AGM) at 26 hpf were stronger in cavefish  
320 than in surface fish (Fig. 2A, C). These results, which are supported by qPCR  
321 quantifications (Fig 1H), confirm enhanced development of erythrocytes in cavefish  
322 and show that primitive erythropoiesis occurs in both the ALM and PLM in *Astyanax*  
323 embryos.

324 In zebrafish, the ALM undergoes myelopoiesis, rather than erythropoiesis, to  
325 form macrophages, which disperse throughout the embryo (Herbomel et al., 1999).  
326 To determine if the *Astyanax* ALM also contains macrophage progenitors during the  
327 period of *hbb2* and *gif1aa* expression, *in situ* hybridizations were performed at 15  
328 hpf using the *l-plastin1* (*lcp1*) gene, a marker for differentiated macrophages  
329 (Herbomel et al., 2001). This stage is equivalent to the 13-17 somite stage in  
330 zebrafish, when macrophage migration is seen over the yolk mass (Herbomel et al.,  
331 1999). The results showed that *lcp1* expressing cells were distributed throughout  
332 the ventral body and yolk masses of surface fish and cavefish embryos, implying  
333 that macrophages had already differentiated and migrated away from the ALM (Fig  
334 2B). Therefore, it is likely that the erythrocyte progenitors in the *Astyanax* ALM  
335 represent an independent hematopoietic lineage.

336 To further explore erythropoiesis in surface fish and cavefish embryos, we  
337 performed *in situ* hybridizations with the *lim domain only 2* (*lmo2*) gene, a marker of  
338 developing blood cells (Patterson et al., 2007). The results confirmed that both

339 anterior and posterior regions are responsible for blood cell development in surface  
340 fish and cavefish embryos, and also showed that *lmo2* expression and erythrocyte  
341 production is expanded in the ALM and PLM during primitive erythropoiesis in  
342 cavefish.

343 In summary, the results indicate that the increase in cavefish red blood cells  
344 is due to the enhancement and expansion of erythropoiesis in the ALM and PLM  
345 during embryonic development.

346

347 *Cavefish are more resistant to red blood cell ablation than surface fish*

348 To understand the role of erythrocytes in early development, we compared  
349 the responses of surface fish and cavefish embryos to red blood cell ablation  
350 induced by phenylhydrazine (PHZ) (Houston et al., 1988). In these experiments,  
351 embryos were incubated with 1, 2, or 4 mg L<sup>-1</sup> PHZ from 12 to 40 hpf, the effects on  
352 erythrocyte number were determined by *in situ* hybridization with *hbb2*, red blood  
353 cells were quantified by video counting (Fig. 1), and morphological changes were  
354 assayed by microscopy (Fig. 3A-D). In both surface fish and cavefish embryos, *hbb2*  
355 staining decreased as a function of increased PHZ concentration (Fig. 3A).

356 Erythrocyte staining was minimal in surface fish at 2 mg L<sup>-1</sup> PHZ, whereas  
357 considerable *hbb2* staining remained in cavefish at this concentration.

358 Quantification reinforced this result, and showed that cavefish have more  
359 circulating blood cells remaining after PHZ ablation than surface fish (Fig. 3B).

360 Observation of living embryos showed surface fish treated with 1 or 2 mg L<sup>-1</sup> PHZ  
361 developed edemas, which were visible as effusions displacing a portion of the yolk  
362 near the ventrally located heart (Fig. 3C). In contrast, cavefish did not develop  
363 edemas at these concentrations (Fig. 3C), although edemas were eventually  
364 observed at 4 mg L<sup>-1</sup> PHZ. Furthermore, surface and cavefish with ablated red cells  
365 showed axial defects, most notably swollen notochords and shortened and ventrally  
366 bent tails (Fig 3C). Tail length was reduced and the proportion of surface fish larvae  
367 with shorter tails was increased as a function of PHZ concentration, and the extent  
368 of tail reduction was higher in surface fish than in cavefish exposed to the same PHZ  
369 concentration (Fig. 3D). These results show that cavefish are less sensitive than

370 surface fish to red blood cell ablation, possibly because of their increased  
371 erythrocyte numbers. The results also suggest that erythrocytes are required for  
372 normal *Astyanax* development.

373

#### 374 *Cavefish fare better than surface fish in hypoxic environments*

375 Cave waters are commonly low in oxygen, therefore we hypothesized that an  
376 increase in red blood cells may be advantageous for combating hypoxia. To test this  
377 hypothesis, a cave-like hypoxic environment was emulated in the laboratory by  
378 comparing the development of surface fish and cavefish embryos raised in inert  
379 plastic tubes filled with hypoxic water (Fig. 4A). Embryos were placed in tubes at 16  
380 hpf, incubation was continued for 22 hours, and larvae were assayed for survival,  
381 red blood cell numbers, and morphological differences. Video analysis of blood flow  
382 over the yolk (Fig. 1) showed a mean of 125 +/- 38 erythrocytes in cavefish  
383 compared to 45 +/- 33 erythrocytes in surface fish, suggesting that the differences  
384 between cavefish and surface fish erythrocytes were not changed by hypoxia,  
385 although the total numbers of blood cells may have been somewhat reduced. Most  
386 surface fish and cavefish (38 of 40 for each morph) survived in hypoxic  
387 environments, however, all surface fish exposed to hypoxic tubes developed  
388 edemas, although no axial problems were evident, whereas edemas were absent in  
389 all cavefish larvae raised in hypoxic tubes. These results suggest that cavefish, which  
390 have more blood cells than surface fish, are better able to cope with hypoxic  
391 conditions than surface fish.

392

#### 393 *Cavefish upregulate hypoxia related genes and reprogram metabolism in a hypoxic* 394 *environment*

395 To compare the molecular responses of surface fish and cavefish to the  
396 emulated hypoxic environment described above, qPCR analyses were performed  
397 using marker genes for hypoxia and hypoxia-related metabolic changes. We  
398 examined *hif1a1*, a homologue of zebrafish *hif3a* that is transcriptionally regulated  
399 by the HIF1 hypoxia master regulator (Pasanen et al., 2010), and other genes  
400 controlled by HIF1 (Iyer et al., 1998, Kim et al., 2006, Cui et al., 2017): *hexokinase 1*

401 (*hk1*), which is involved in glycolysis, *lactate dehydrogenase a (ldha)*, which is  
402 involved in fermentation, and *pyruvate dehydrogenase kinase1 (pdk1)*, which is  
403 involved in inhibiting the TCA cycle in mitochondria. In addition, genes were  
404 assayed that are functionally associated with hypoxia or hypoxia induced processes,  
405 but not known to be controlled by HIF1: *ATP-dependent 6-phosphofructokinase*  
406 (*pfkma*), which is involved in glycolysis (Ptashne et al., 1983), *lactate dehydrogenase*  
407 *b (ldhb)* and *monocarboxylate transporter1 (mct1)*, which are involved in  
408 fermentation (Ždravlević et al., 2018; Miranda-Gonçalves, 2016), and *pyruvate*  
409 *dehydrogenase kinase 2 (pdk2)*, which functions similarly to *pdk1* but is regulated by  
410 hormones and insulin signaling pathways (Jeong et al., 2012).

411 In these experiments, we compared expression of the genes listed above in  
412 surface fish and cavefish raised in tubes containing hypoxic water or normoxic  
413 water. Figure 4B shows expression of these genes in surface fish and cavefish as  
414 fold change of hypoxic over normoxic conditions. Expression of *hif1al* was up-  
415 regulated more than 2-fold in cavefish under hypoxic conditions, indicating a strong  
416 response to hypoxia, whereas under the same conditions surface fish showed a  
417 change of *hif1al* of less than one fold, indicating a decrease in expression (Fig. 4B a).  
418 Cavefish appear to downregulate mitochondrial function as a response to hypoxia,  
419 as shown by about 2.5 and 5.5 fold increases in *pdk1* and *pdk2* expression  
420 respectively, while in surface fish this inhibition of mitochondrial function is  
421 reduced, as shown by 0.5 or less fold change in expression (Fig. 4B b). The  
422 approximate 19 fold increase in *hk1* and 5.5 fold increase in *pfkma* expression in  
423 cavefish under hypoxic relative to normoxic conditions suggested that cavefish  
424 increase glycolysis during hypoxia, probably to compensate for the reduction of ATP  
425 synthesis by mitochondria, compared to about a 0.5 fold change, indicating  
426 suppression of glycolysis, in surface fish (Fig. 4B c). Additionally, *ldha* and *ldhb*  
427 were up-regulated about 2 and 3 fold and *mct1* by about 3 fold in cavefish raised in  
428 hypoxic compared to normoxic waters, suggesting fermentation of pyruvate and  
429 continuation of glycolysis by generating NAD<sup>+</sup>, while in surface fish a change of less  
430 than 1 fold of these genes suggested a reduction in fermentation capacity (Fig. 4B d).

431 In summary, the results show that cavefish respond to hypoxia by increasing  
432 expression of hypoxia and hypoxia-related metabolic genes while surface fish react  
433 to hypoxia by suppressing these genes (Fig. 4B), suggesting that cavefish have a  
434 more robust response to hypoxia than surface fish. Furthermore, the results  
435 provide evidence that surface fish and cavefish respond differently to hypoxia.  
436 Surface fish appear to counteract hypoxia by continuing to undergo oxidative  
437 phosphorylation, whereas cavefish reprogram metabolism to increase glycolysis  
438 and anaerobic metabolism as responses to hypoxia.

439

440

441

442

443

444

445

446

447

448

449

450

451

452

453

454

455

456

457

458

459 **Discussion**

460

461 Proliferation of red blood cells is one of the classic responses to reduced  
462 oxygen levels in vertebrates. For example, humans show a temporary increase in  
463 the production of erythrocytes during acclimation to high altitudes (Haase, 2013).  
464 In *Astyanax*, we found that cavefish embryos develop more red blood cells than  
465 surface fish embryos when raised under normoxic laboratory conditions. This  
466 conclusion is based on three lines of evidence: (1) direct counts of red blood cells,  
467 (2) increased expression of the *hbb2* and *hbbe2* globin genes, and (3) hyper-  
468 expression of the *gfi1aa* gene, a crucial regulator of hematopoiesis. Hematopoiesis  
469 occurs in two waves in teleosts and other vertebrates: the primitive and definitive  
470 waves (Davidson and Zon, 2004; Paik and Zon, 2010). Increased *hbb2*, *hbbe2*, and  
471 *gfi1aa* expression was observed during embryogenesis and after larval hatching.  
472 Transfusion experiments indicate that blood cells circulating during the first four  
473 days of zebrafish development are primitive erythrocytes (Weinstein et al., 1996). If  
474 this is also the case in *Astyanax*, then our findings suggest that surface fish and  
475 cavefish larval blood cells are primitive erythrocytes derived from the first wave of  
476 hematopoiesis. Nevertheless, we also found stronger expression of the marker  
477 genes in the AGM and caudal hematopoietic tissue, which are involved in definitive  
478 hematopoiesis, implying that the second wave is also expanded in cavefish. We  
479 conclude that cavefish have evolved a permanent enhancement in red blood cells as  
480 an adaptation for survival in hypoxic cave waters.

481 Using *hbb2*, *gfi1aa*, and *lmo2* genes as markers of hematopoiesis and  
482 erythropoiesis, red blood cell development could be traced back to the early stages  
483 of surface fish and cavefish embryogenesis. The *lmo2* gene was a particularly useful  
484 indicator for hematopoietic origins because it encodes a transcription factor critical  
485 for early hematopoietic development and is essential for erythropoiesis (Yamada et  
486 al, 1998; Warren et al., 1994). The expression patterns of *lmo2* and other marker  
487 genes indicate that the primitive erythrocytes of cavefish and surface fish are  
488 derived from two different hematopoietic domains, one located anteriorly in the  
489 ALM and the other posteriorly in the PLM. Importantly, the anterior and posterior  
490 embryonic domains show expanded marker gene expression in cavefish compared  
491 to surface fish. It is noteworthy that expansion of the posterior hematopoietic



492 domain can be induced in zebrafish by overexpressing LMO2 together with its  
493 partner transcription factor SCL/TAL1 (Gering et al., 2003), suggesting that teleosts  
494 have the innate ability to modulate blood cell numbers during development.

495       Expansion of erythropoiesis into the ALM during *Astyanax* primitive  
496 hematopoiesis contrasts strikingly to zebrafish, medaka, and other teleosts, where  
497 embryonic erythropoiesis is confined to the PLM, and the ALM is devoted to  
498 myelopoiesis (Detrich et al., 1995; Govoni et al., 2005, Moriyama et al., 2010).  
499 Evidence from the macrophage marker *lcp1* (Herbomel et al., 2001) indicated that  
500 myelopoietic precursors had already differentiated into macrophages as erythrocyte  
501 progenitors were being formed in the ALM of early *Astyanax* embryos, and thus are  
502 distinct from anteriorly derived erythrocytes. Cell tracing studies in zebrafish have  
503 shown that blood precursor cells produce either erythrocytes or macrophages, but  
504 not both cell types (Warga et al., 2009), indicating an opposing relationship between  
505 the erythroid and myeloid cell populations. However, it has been reported that this  
506 relationship can be reversed by knockdown of the myeloid-controlling transcription  
507 factor PU.1, which induces blood precursors of the ALM to form erythrocytes  
508 instead of macrophages (Rhodes et al., 2005). Apparently, teleosts are potentially  
509 able to undergo erythropoiesis in both the ALM and PLM, but in most species this  
510 capacity is normally confined to the PLM. In *Astyanax*, the balanced relationship  
511 between myeloid and erythroid cell specification appears to have tilted toward the  
512 production of erythrocytes. However, the development of erythrocytes in the ALM is  
513 not necessarily at the expense of fewer myeloid cells because there is also an overall  
514 expansion of the ALM (and PLM) in *Astyanax* embryos, which presumably includes  
515 the specification of more blood precursor cells. The existence of erythrocyte  
516 forming capacity in the ALM of surface fish, albeit smaller than in cavefish, suggests  
517 that *Astyanax* may be pre-adapted for colonizing hypoxic cave environments.

518       Specification of cells in the primitive blood lineage can be traced back to their  
519 positions during gastrulation in zebrafish (Kimmel et al., 1990): ALM macrophages  
520 are originally derived from progenitors on the dorsal side of the embryo, and PLM  
521 erythrocytes originate from the ventral side of the embryo (Davidson and Zon,  
522 2004; Warga et al., 2009). Erythrocyte progenitors corresponding to the ALM and

523 PLM are also likely to be positioned on the dorsal or ventral sides respectively in  
524 gastrulating *Astyanax* embryos. Therefore, increased erythropoiesis in the ALM  
525 suggests that a relative ventralization of hematopoietic development has evolved in  
526 cavefish compared to surface fish. This possibility is supported by the expansion of  
527 erythroid development in zebrafish by overexpression of the ventralizing factors  
528 *bmp2b* and *bmp7* during the gastrula period (Lengerke et al., 2008) and is in line  
529 with evidence implicating evolutionary changes in dorsal-ventral axis determination  
530 based on modified Spemann organizer activity in cavefish embryos (Ren et al., 2018;  
531 Ma et al., 2018).

532 Teleosts show considerable diversity in utilizing hemoglobin and red blood  
533 cells for oxygen transport during development: some species begin hemoglobin  
534 synthesis during embryogenesis, whereas others postpone hemoglobin and  
535 erythrocyte production until late in larval development (Wells, 2009). In the present  
536 investigation, the ability to ablate red blood cells in a concentration dependent  
537 manner with PHZ allowed determination of the functional significance of embryonic  
538 red blood cells during early *Astyanax* development and their enhancement in  
539 cavefish embryos. Surface fish embryos with most red blood cells ablated by PHZ  
540 develop abnormally, exhibiting edemas and axial (notochord, tail formation) defects,  
541 but cavefish exposed to the same PHZ concentrations and exhibiting residual red  
542 blood cells do not show any edemas and axial defects are less severe. These results  
543 suggest that red blood cells are necessary for oxygen transport at early stages of  
544 *Astyanax* development and that larger numbers of erythrocytes are advantageous in  
545 cavefish. This is contrary to the situation in zebrafish, where PHZ ablation shows  
546 that red blood cells are not required during the first few weeks of development  
547 under normoxic conditions (Pelster and Burggren, 1996), although under severe  
548 hypoxic conditions zebrafish embryos use red blood cells to increase the supply of  
549 oxygen (Rombough and Drader, 2009). Furthermore, pelagic teleosts, such as the  
550 halibut (Pittman et al, 1990) and spot (Govoni et al., 2005), do not produce  
551 hemoglobin until just before metamorphosis, and icefish do not produce any red  
552 blood cells throughout life (Ruud, 1954). These differences may be explained by  
553 size, *Astyanax* larvae are larger than zebrafish larvae, and thus may be more

554 resistant to simple oxygen diffusion, the probability of exposure to intermittent  
555 hypoxia, which is rare in pelagic teleosts, or high oxygen solubility at very low water  
556 temperatures in icefish habitats. The requirement of red blood cells for normal  
557 development in *Astyanax* provides additional support for the possibility that early  
558 formation of erythrocytes could be a pre-adaptation for the successful colonization  
559 of hypoxic cave waters.

560 Teleosts have evolved different strategies to cope with environments  
561 depleted in oxygen, including changes in gill morphology (i.e. crucian carp, Sollid et  
562 al., 2003), behavioral avoidance of hypoxic waters (i. e. woolly sculpins, Congleton,  
563 1980), and altered metabolism (i. e. mesopelagic fishes, Torres et al., 2012). It is  
564 well known that *Astyanax* cavefish exhibit reduced metabolic rates compared to  
565 surface fish (Hüppop, 1986; Moran et al., 2014; Aspiras et al., 2015), but the effects  
566 of hypoxia on metabolic programs have not been previously determined. The  
567 approach used to determine the effects of hypoxia on metabolism was to assay  
568 expression changes in key genes underlying the different metabolic states and  
569 outcomes in surface fish and cavefish embryos confined to hypoxic tubes in the  
570 laboratory. The hypoxic tubes closely emulated hypoxic conditions in Sierra de El  
571 Abra cave waters by permanent exposure to about 50% oxygen levels (Rohner et al.,  
572 2013, Ornelas-Garcia et al., 2018). Surface fish, which do not have as many red  
573 blood cells as cavefish, suppress metabolism in response to low oxygen, as indicated  
574 by decreased expression of glycolytic and anaerobic genes. Reduced metabolism is  
575 an evolutionary strategy for limited survival in hypoxic environments (Regan et al.,  
576 2017), a strategy that could suffice for surface fish because hypoxia exposure may  
577 be intermittent and/or they may be able to counteract low oxygen by moving to  
578 normoxic waters. In contrast, upregulated expression of key glycolytic,  
579 fermentation, and anaerobic genes suggested that cavefish react to hypoxia by  
580 shifting to anaerobic metabolism, which may be enabled by more red blood cells. To  
581 counteract the accumulation of lactate they also increase the efflux of lactate out of  
582 cells as suggested by increased expression of a lactate transporter. This strategy  
583 may be adaptive for life in hypoxic cave waters because metabolic depression is  
584 likely to be detrimental over time and cavefish are unable to escape by moving to

585 more highly oxygenated waters. Our studies reveal a key difference between surface  
586 fish and cavefish in metabolic reprogramming as a response to low oxygen.

587 In conclusion, the present investigation has revealed two cavefish  
588 adaptations that may have evolved to better sustain life in hypoxic cave waters.  
589 First, cavefish have evolved enhanced development of red blood cells and thus may  
590 have increased their capacity to carry and distribute essential oxygen to tissues and  
591 organs. Second, cavefish have coped with more permanent hypoxic conditions by  
592 evolving the potential to reprogram metabolism toward anaerobic processes.  
593 Together, these changes could be key contributors for successful adaptation of  
594 cavefish to hypoxic environments.

595

596

597

598

599

600

601

602

603

604

605

606

607

608

609

610

611

612

613

614 **Acknowledgments**

615

616           This research was supported by NIH grant EY024941 to WRJ. We thank  
617 Ruby Dessiatoun for maintenance of the *Astyanax* population and Mandy Ng for  
618 technical assistance.

619

#### 620 **Competing interests**

621

622           The authors declare no competing or financial interests

623

#### 624 **Author contributions**

625

626           CMW and WRJ conceived the project. CMW performed the experiments. CMW  
627 and WRJ wrote the manuscript.

628

#### 629 **Funding**

630

631           Funding for this study was provided by the National Institutes of Health  
632 (EY024941 to WRJ)

633

634

635

636

637

638

639

640

641

642

643

644

#### 645 **References**

646

647 **Aspiras, A. C., Rohner, N., Martineau, B., Borowsky, R. L. and Tabin, C. J.** (2015).  
648 Melanocortin 4 receptor mutations contribute to the adaptation of cavefish to nutrient-  
649 poor conditions. *Proc. Natl. Acad. Sci. USA* **112**, 9668-9673.

650

651 **Benson, B.B., Krause, D. and Peterson, M.A.** (1979). The solubility and isotropic  
652 fractionation of gases in dilute aqueous solution. I. Oxygen. *J. Solution Chem.* **8**, 655-  
653 690.

654

655 **Bishop, R. E., Kakuk, B. and Torres, J. J.** (2004). Metabolism and proximate  
656 composition of Caribbean troglotic Crustaceans with observations on the water  
657 chemistry of two anchialine caves. *J. Crust. Biol.* **24**, 379-392.

658

659 **Brownlie, A., Hersey, C., Oates, A. C., Paw, B. H., Falick, A. M., Witkowska, H. E.,**  
660 **Flint, J., Higgs, D., Jessen, J., Bahary, N. et al.** (2003). Characterization of  
661 embryonic globin genes of the zebrafish. *Dev. Biol.* **255**, 48-61.

662

663 **Carroll, K.J. and North, T.E.** (2014). Oceans of opportunity: exploring vertebrate  
664 hematopoiesis in zebrafish. *Exp. Hematol.* **42**, 684-696.

665

666 **Congleton, J. L.** (1980). Observations on the responses of some southern California  
667 tidepool fishes to nocturnal hypoxic stress. *Comp. Biochem. Physiol.* **66A**, 719-122.

668

669 **Cooney, J. D., Hildick-Smith, G. J., Shafizadeh, E., McBride, P. F., Carroll, K. J.,**  
670 **Anderson, H., Shaw, G. C., Tamplin, O. J., Branco, D. S., Dalton, A. J., et al.** (2013).  
671 Teleost *growth factor independence (gfi)* genes differentially regulate successive  
672 waves of hematopoiesis. *Dev. Biol.* **373**, 431-441.

673

674 **Cui, X. G., Han, Z. T., He, S. H., Wu, X. D., Chen, T. R., Shao, C. H., Chen, D. L., Su, N.,**  
675 **Chen, Y. M., Wang, T. et al.** (2017). HIF1/2 $\alpha$  mediates hypoxia-induced LDHA  
676 expression in human pancreatic cancer cells. *Oncotarget* **8**, 24840-24852.

677

- 678 **Culver, D. C. and Pipan, T.** (2009). *The Biology of Caves and Other Subterranean*  
679 *Habitats*. Oxford UK: Oxford University Press.  
680
- 681 **Davidson, A. J. and Zon, L. I.** (2004). The ‘definitive’ (and ‘primitive’) guide to  
682 zebrafish hematopoiesis. *Oncogene* **23**, 7233-7246.  
683
- 684 **Detrich, H. W., Kieran, M. W., Chan, F. Y., Barone, L. M., Yee, K., Rundstadler, J.,**  
685 **Pratt, S., Ransom, D., Zon, L. I.** (1995). Intraembryonic hematopoietic cell  
686 migration during vertebrate development. *Proc. Natl. Acad. Sci. USA* **92**: 10713-  
687 10717.  
688
- 689 **Espinasa, L., Bibliowicz, J., Jeffery, W. R. and Rétaux, S.** (2014). Enhanced prey  
690 capture skills in *Astyanax* cavefish larvae are independent from eye loss. *Evodevo* **5**,  
691 35-41.  
692
- 693 **Fumey, J., Hinaux, H., Noirot, C., Thermes, C., Rétaux, S. and Casane, D.** (2018).  
694 Evidence for late Pleistocene origin of *Astyanax mexicanus* cavefish. *BMC Evol. Biol.*  
695 **18(1)**:43. doi: 10.1186/s12862-018-1156-7.  
696
- 697 **Ganis, J. J., Hsia, N., Trompouki, E., de Jong, J. L. O., DiBiase, A., Lambert, J. S.,**  
698 **Zhiying, J., Sabo, P. J., Weaver, M., Sandstrom, R. et al.** (2012). Zebrafish globin  
699 switching occurs in two developmental stages and is controlled by the LCR. *Dev. Biol.*  
700 **366**, 185-194.  
701
- 702 **Gering, M., Yamada, Y., Rabbitts, T. H. and Patient, R. K.** (2003). Lmo2 and  
703 Scl/Tal1 convert non-axial mesoderm into haemangioblasts which differentiate into  
704 endothelial cells in the absence of Gata1. *Development* **130**, 6187-6199.  
705
- 706 **Gore, A.V., Pillay, L.M., Galanternik, M.V. and Weinstein, B.M.** (2018). The  
707 zebrafish: A fantastic model for hematopoietic development and disease. *Wiley*  
708 *Interdiscip. Rev. Dev. Biol.* **7**, e312-328.

709

710 **Govoni, J. J., West, M. A., Bonaventura, J., Goddette, G., and Jenkins, T. E. (2005).**

711 The ontogeny of hematopoiesis in the marine teleost *Leiostomus xanthurus* and a

712 comparison of the site of initial hematopoiesis with *Opsanus tau*. *J. Fish Biol.* **67**,

713 696-712.

714

715 **Gross, J.B. (2012).** The complex origin of *Astyanax* cavefish. *BMC Evol. Biol.* **12**, 105-

716 116.

717

718 **Haase, V. H. (2013).** Regulation of erythropoiesis by hypoxia-inducible factors.

719 *Blood Rev.* **27**: 41-53.

720

721 **Herbomel, P., Thisse, B. and Thisse C. (1999).** Ontogeny and behaviour of early

722 macrophages in the zebrafish embryo. *Development* **126**, 3735-3745.

723

724 **Herbomel, P., Thisse, B. and Thisse, C. (2001).** Zebrafish early macrophages

725 colonize cephalic mesenchyme and developing brain, retina and epidermis through

726 a M-CSF receptor-dependent invasive process. *Dev. Biol.* **238**, 274-288.

727

728 **Herman, A., Brandvain, Y. Weagley, J., Jeffery, W. R., Keene, A. C., Kono, T. J. Y.,**

729 **Bilandžija, H., Borowsky, R., Espinasa, L. O'Quin, K., et al. (2018).** The role of

730 gene flow in rapid and repeated evolution of cave related traits in Mexican tetra,

731 *Astyanax mexicanus*. *Mol. Ecol.* **27**, 4397-4416.

732

733 **Houston, A.H., Murad, A. and Gray, J.D. (1988)** Induction of anemia in goldfish,

734 *Carassius auratus* L., by immersion in phenylhydrazine hydrochloride. *Can. J. Zool.*

735 **66**, 729-736.

736

737 **Hüppop, K. (1986).** Oxygen consumption of *Astyanax fasciatus* (Characidae, Pisces):

738 a comparison of epigeal and hypogean populations. *Environ. Biol. Fishes* **17**, 299-

739 308.



740

741 **Iuchi, I. and Yamamoto, M.** (1983). Erythropoiesis in the developing rainbow trout,  
742 *Salmo gairdneri irideus*: histochemical and immunochemical detection of  
743 erythropoietic organs. *J. Exp. Zool.* **226**, 409-417.

744

745 **Iyer, N. V., Kotch, L. E., Agani, F., Leung, S. W., Laughner, E., Wenger, R. H.,**  
746 **Gassmann, M., Gearhart, J. D., Lawler, A. M., Yu, A. Y. et al.** (1998). Cellular and  
747 developmental control of O<sub>2</sub> homeostasis by hypoxia-inducible factor 1 $\alpha$ . *Genes Dev.*  
748 **12**, 149-162.

749

750 **Jeffery, W. R., Strickler, A. G., Guiney, S., Heyser, D. and Tomarev, S. I. (2000).**  
751 *Prox 1* in eye degeneration and sensory compensation during development and  
752 evolution of the cavefish *Astyanax*. *Dev. Genes. Evol.* **210**, 223-230.

753

754 **Jeong, J. Y., Jeoung, N. H., Park, K.-G. and Lee, I. K.** (2012). Transcriptional  
755 regulation of pyruvate dehydrogenase kinase. *Diabetes Metab. J.* **36**, 328-335.

756

757 **Kim, J-W., Tchernyshyov, I., Semenza, G. L. and Dang, C. V.** (2006). HIF-1-  
758 mediated expression of pyruvate dehydrogenase kinase: A metabolic switch  
759 required for cellular adaptation to hypoxia. *Cell Metab.* **3**, 177-185.

760

761 **Kimmel, C. B., Warga, R. M. and Schilling, T. F.** (1990). Origin and organization of  
762 the zebrafish fate map. *Development* **108**, 581-594.

763

764 **Le Guyader, D., Redd, M.J., Colucci-Guyon, E., Murayama, E., Kissa, K., Briolat, V.,**  
765 **Mordelet, E., Zapata, A., Shinomiya, H., and Herbomel, P.** 2008. Origins and  
766 unconventional behavior of neutrophils in developing zebrafish. *Blood* **111**, 132-  
767 141.

768

769 **Lengerke, C., Schmitt, S., Bowman, T.V., Jang, I. H., Maouche-Chretien**  
770 **L., McKinney-Freeman, S., Davidson, A. J., Hammerschmidt, M., Rentzsch,**

- 771 **F., Green, J. B., Zon, L. et al.** (2008). BMP and Wnt specify hematopoietic fate by  
772 activation of the Cdx-Hox pathway. *Cell Stem Cell* **2**, 72–82.  
773
- 774 **Ma, L., Parkhurst, A. and Jeffery, W. R.** (2014). The role of a lens survival pathway  
775 including *sox2* and  $\alpha$ A-crystallin in the evolution of cavefish eye degeneration.  
776 *Evodevo*. **5**, 28-41.  
777
- 778 **Ma, L., Strickler, A. G., Parkhurst, A., Yoshizawa, M., Shi, J. and Jeffery, W.R.**  
779 (2018). Maternal genetic effects in *Astyanax* cavefish development. *Dev. Biol.* **441**,  
780 209-220.  
781
- 782 **Majmundar, A. J., Wong, W.J., and Simon, M. C.** (2010). Hypoxia-inducible factors  
783 and the response to hypoxic stress. *Mol. Cell* **40**, 294-309.  
784
- 785 **Malard, F., and Hervant, F.** (1999). Oxygen supply and the adaptations of animals  
786 in groundwater. *Freshwater Biol.* **41**, 1-30.  
787
- 788 **Miranda-Gonçalves, V., Granja, S., Martinho, O., Honavar, M., Pojo, M., Costa,**  
789 **B.M., Pires, M. M., Pinheiro, C., Cordeiro, M., Bebiano, G. et al.** (2016). Hypoxia-  
790 mediated upregulation of MCT1 expression supports the glycolytic phenotype of  
791 glioblastomas. *Oncotarget* **7**, 46335-46353.  
792
- 793 **Mitchell, R. W., Russel, W. H., and Elliott, W. R.** (1977). *Mexican eyeless characin*  
794 *fishes, genus Astyanax: environment, distribution and evolution.* (Lubbock: Texas Tech  
795 Press).  
796
- 797 **Moore, C., Richens, J. L., Hough, Y., Ucanok, D., Malla, S., Sang, F., Chen, Y.,**  
798 **Elworthy, S., Wilkinson, R. N. and Gering, M.** (2018). Gfi1aa and Gfi1b set the pace  
799 for primitive erythroblast differentiation from hemangioblasts in the zebrafish  
800 embryo. *Blood Adv.* **2**, 2589-2606.  
801

802 **Moran, D., Softley, R. and Warrant, E. J. (2014).** Eyeless Mexican cavefish save  
803 energy by eliminating the circadian rhythm in metabolism. *PLoS ONE* **9**,  
804 e107877.<https://doi.org/10.1371/journal.pone.0107877>  
805  
806 **Moran, D., Softley, R. and Warrant, E. J. (2015).** The energetic cost of vision and  
807 the evolution of eyeless Mexican cavefish. *Sci. Adv.* **1**, e1500363.  
808  
809 **Moriyama, A., Inohaya, K., Maruyama, K. and Kudo, A. (2010).** Bef medaka mutant  
810 reveals the essential role of c-myb in both primitive and definitive hematopoiesis.  
811 *Dev. Biol.* **345**, 133-143.  
812  
813 **Möröy, T., Vassen, L., Wilkes, B. and Khandanpour, C. (2015).** From cytopenia to  
814 leukemia: the role of Gfi1 and Gfi1b in blood formation. *Blood* **126**, 2561-2569.  
815  
816 **Ornelas-García, P., Pajares, S., Sosa-Jiménez, V. M., Rétaux, S. and Miranda-**  
817 **Gamboa, R. A. (2018).** Microbiome differences between river-dwelling and cave-  
818 adapted populations of the fish *Astyanax mexicanus* (De Filippi, 1853). *Peer J.* **6**,  
819 e5906-5926.  
820  
821 **Paik, E. J. and Zon, L. I. (2010).** Hematopoietic development in the zebrafish. *Int. J.*  
822 *Dev. Biol.* **54**, 1127-1137.  
823  
824 **Pasanen, A., Heikkilä, M., Rautavuoma, K., Hirsilä, M., Kivirikko, K.I. and**  
825 **Mylyharju, J. (2010).** Hypoxia-inducible factor (HIF)-3 $\alpha$  is subject to extensive  
826 alternative splicing in human tissue and cancer cells and is regulated by HIF-1 but  
827 not HIF-2. *Int. J. Biochem. Cell Biol.* **42**, 1189-1200.  
828  
829 **Patterson, L. J., Gering, M., Eckfeldt, C. E., Green, A. R., Verfaillie, C. M., Ekker, S.**  
830 **C. and Patient, R. (2007).** The transcription factors Scl and Lmo2 act together  
831 during development of the hemangioblast in zebrafish. *Blood* **109**, 2389-2398.  
832

- 833 **Pelster, B. and Burggren, W. W.** (1996). Disruption of hemoglobin oxygen  
834 transport does not impact oxygen-dependent physiological processes in developing  
835 embryos of zebra fish (*Danio rerio*). *Circ. Res.* **79**, 358-362.
- 836
- 837 **Pittman, K., Skiftesvik, A. B. and Berg, L.** (1990). Morphological and behavioural  
838 development of halibut, *Hippoglossus hippoglossus* (L.) larvae. *J. Fish Biol.* **37**, 455 -  
839 472.
- 840
- 841 **Ptashne, K. A., Theodore, J. and Robin, E. D.** (1983). Increased  
842 phosphofructokinase content during chronic hypoxia in cultured skeletal muscle  
843 (L8) cells. *Biochim. Biophys. Acta.* **763**, 169-174.
- 844
- 845 **Regan, M.D., Gill, I.S. and Richards, J.G.** (2017). Metabolic depression and  
846 evolution of hypoxia tolerance in threespine stickleback, *Gasterosteus aculeatus*. *Bio.*  
847 *Lett.* **13**, <https://doi.org/10.1098/rsbl.2017.0392>
- 848
- 849 **Ren, X., Hamilton, N., Müller, F. and Yamamoto, Y.** (2018). Cellular  
850 rearrangement of the prechordal plate contributes to eye degeneration in the  
851 cavefish. *Dev. Biol.* **441**, 221-234.
- 852
- 853 **Rhodes, J., Hagen, A., Hsu, K., Deng, M., Ting, X. L., Look, T. and Kanki, J. P.**  
854 **(2005).** Interplay of Pu.1 and gata1 determines myelo-erythroid progenitor cell  
855 fate in zebrafish. *Dev. Cell* **8**, 97-108.
- 856
- 857 **Rohner, N., Jarosz, D. F., Kowalko J. E., Yoshizawa, M., Jeffery, W. R., Borowsky,**  
858 **R. L., Lindquist, S. and Tabin, C. J.** (2013). Cryptic variation in morphological  
859 evolution: HSP90 as a capacitor for loss of eyes in cavefish. *Science* **342**, 1372-1375.
- 860
- 861 **Rombough, R. and Drader, H.** (2009). Hemoglobin enhances oxygen uptake in  
862 larval zebrafish (*Danio rerio*) but only under conditions of extreme hypoxia. *J. Exp.*  
863 *Biol.* **212**, 778-784.

864

865 **Rosenthal, R. and Rosnow, R.L.** (1991) *Essentials of behavioral research, methods*  
866 *and data analysis*. New York, USA: McGraw-Hill.

867

868 **Ruud, J.T.** (1954). Vertebrates without erythrocytes and blood pigment. *Nature* 173,  
869 848-850.

870

871 **Schindelin, J., Arganda-Carreras, I., Frise, E., Kaynig, V., Longair, M., Pietzsch, T.,**  
872 **Preibisch, S., Rueden, C., Saalfeld, S., Schmid, B. et al.** (2012). Fiji: an open-source  
873 platform for biological-image analysis. *Nat. Meth.* **9**, 676-682.

874

875 **Sollid, J., De Angelis, P., Gundersen, K. and Nilsson, G. E.** (2003). Hypoxia induces  
876 adaptive and reversible gross morphological changes in crucian carp gills. *J. Exp.*  
877 *Biol.* **206**, 3667-3673.

878

879 **Tinevez, J-Y., Perry, N., Schindelin, J., Hoopes, G. M., Reynolds, G. D., Laplantine,**  
880 **E., Bednarek, S. Y., Shorte, S. L. and Eliceiri, K. W.** (2017). TrackMate: An open  
881 and extensible platform for single-particle tracking. *Methods* **115**, 80-90.

882

883 **Torres, J.J., Grigsby, M.D. and Clarke, M.E.** (2012). Aerobic and anaerobic  
884 metabolism in oxygen minimum layer fishes: the role of alcohol dehydrogenase. *J.*  
885 *Exp. Biol.* **215**, 1905-1914.

886

887 **Varatharasan, N., Croll, R.P. and Franz-Odenaal, T.** (2009). Taste bud  
888 development and patterning in sighted and blind morphs of *Astyanax mexicanus*.  
889 *Dev. Dyn.* **238**, 3056-3064.

890

891 **Warga, R. M., Kane, D. A. and Ho, R. K.** (2009). Fate mapping embryonic blood in  
892 zebrafish: multi- and unipotential lineages are segregated at gastrulation. *Dev. Cell*  
893 **16**, 744-755.

894

- 895 **Warren, A.J., Colledge, W.H., Carlton, M.B.L., Evans, M.J., Smith, A.J.H. and**  
896 **Rabbitts, T.H.** (1994). The Oncogenic Cysteine-Rich LIM Domain Protein Rbtn2 is  
897 essential for erythroid development. *Cell* **78**, 45-57  
898
- 899 **Wheaton, W.W. and Chandel, N.S.** (2011). Hypoxia. 2. Hypoxia regulates cellular  
900 metabolism. *Am. J. Physiol. Cell Physiol.* **300**, C385-C393.  
901
- 902 **Wei, W., Wen, L. Huang, P., Zhang, Z., Chen, Y., Xiao, A., Huang, H., Zhu, Z., Zhang,**  
903 **B. and Lin, S.** (2008). GFi1.1 regulates hematopoietic lineage differentiation during  
904 zebrafish embryogenesis. *Cell Res.* **18**, 677-685.  
905
- 906 **Weinstein, B. M., Schier, A. F., Abdelilah, S., Malicki, J., Solnica-Krezel, L.,**  
907 **Stemple, D. L., Stainier, D. Y., Zwartkruis, F., Driever, W. and Fishman, M. C.**  
908 (1996). Hematopoietic mutations in the zebrafish. *Development* **123**, 303-309.
- 909 **Wells R. M. G.** (2009). Blood-gas transport and hemoglobin function: adaptations  
910 for functional and environmental hypoxia. In *Fish physiology, Vol. 27* (ed. J.G.  
911 Richards, A.P. Farrell and C.J. Brauner). pp. 255–299. New York: Elsevier.
- 912 **Xiong, S., Krishnan, J., Peuß, R. and Rohner, N.** (2018). Early adipogenesis  
913 contributes to excess fat accumulation in cave populations of *Astyanax mexicanus*.  
914 *Dev. Biol.* **441**, 297-304.  
915
- 916 **Yamada, Y., Warren, A.J., Dobson, C., Forster, A. Pannell, R. and Rabbitts, T.H.**  
917 (1998). The T cell leukemia LIM protein Lmo2 is necessary for adult mouse  
918 hematopoiesis. *Proc. Natl. Acad. Sci. USA* **95**, 3890-3895.  
919
- 920 **Yamamoto, Y., Stock, D. W. and Jeffery, W. R.** (2004). Hedgehog signalling controls  
921 eye degeneration in blind cavefish. *Nature* **431**, 844-847.  
922
- 923 **Yoshizawa, M., Jeffery, W.R., van Netten, S. and McHenry, M. J.** (2014). The

924 sensitivity of lateral line receptors and their role in the behavior of Mexican blind  
925 cavefish (*Astyanax mexicanus*). *J. Exp. Biol.* **217**, 886-895.

926

927 **Ždravlević, M., Brand, A., Di Ianni, L., Dettmer, K., Reinders, J., Singer, K., Peter,**  
928 **K., Schnell, A., Bruss, C., Decking, S.-M. et al.** (2018). Double genetic disruption of  
929 lactate dehydrogenases A and B is required to ablate the “Warburg effect”  
930 restricting tumor growth to oxidative metabolism. *J. Biol. Chem.* **293**, 15947-15961.

931

932

933

934

935

936

937

938

939

940

941

942

943

944

945

946

947

948

949

950

951

952

953 **Figure Legends**

954

955 **Figure 1. Cavefish have more erythrocytes than surface fish.** (A). Red  
956 blood cells flowing out of the cardinal vein over the yolk to the heart in surface (SF)  
957 and cavefish (CF) embryos visualized by o-dianisidine staining. (B-E). The number  
958 of circulating blood cells (arrowheads) in a ROI (B, yellow box) visualized by  
959 subtraction of two video frames 0.15 seconds apart (C and D) and quantified using  
960 the plugin TrackMate (Fiji) (D, purple dots). N = 8. Error bars: SD. Asterisk:  $p < 0.05$ .  
961 Statistical analysis using Two-tailed Student's t test. Scale bar in A is  $100\mu\text{m}$ , A-D are  
962 the same magnification. (F, G). *In situ* hybridizations showing more extensive *hbb2*  
963 staining in cavefish (CF) than surface fish (SF) at 36 hpf and 84 hpf. Scale bars in F  
964 and G are  $200\mu\text{m}$ . (H). qPCR quantification of *gfi1aa* and *hbbe2* expression in  
965 developing cavefish (CF) and surface fish (SF). N=3. Error bars: range of fold  
966 change. Asterisks:  $p < 0.05$ . Statistical analysis by one-way ANOVA followed by  
967 Tukey HSD.

968

969 **Figure 2. *In situ* hybridizations showing expression of hematopoietic**  
970 **marker genes in the posterior and anterior lateral mesoderm of surface fish**  
971 **and cavefish embryos.** (A). At 14 hpf *gfi1aa* and *hbb2* are expressed in the anterior  
972 lateral mesoderm (arrowheads) in cavefish (CF) and surface fish (SF) embryos, and  
973 staining is expanded in CF. (B). At 14 hpf *lcp1* is expressed in macrophages  
974 dispersed in SF and CF embryos. (C). At 26 hpf *gfi1aa* and *hbb2* expression are  
975 increased in the posterior blood islands (PBI) in CF compared to SF. (D). At 14 hpf  
976 *lmo2* expression is increased in both the anterior lateral mesoderm and posterior  
977 lateral mesoderm in CF and SF embryos, and staining is expanded in CF. Scale bar in  
978 A and C is  $200\mu\text{m}$ ; magnification is the same in A, B and D.

979

980 **Figure 3. Red blood cells are required for normal development.** (A). *In*  
981 *situ* hybridization with the *hbb2* gene marker in embryos treated with  
982 phenylhydrazine (PHZ) shows that only a few circulating erythrocytes are left at  $1$   
983  $\text{mg L}^{-1}$  PHZ (black arrowhead) and absent at  $2\text{ mg L}^{-1}$  PHZ in surface fish (SF),  
984 whereas erythrocytes are still present in cavefish (CF) treated with the same PHZ  
985 concentrations. Most erythrocytes disappeared from CF embryos treated with  $4\text{ mg}$



986 L<sup>-1</sup> PHZ. Scale bar is 200 μm. (B). The number of remaining circulating red blood  
987 cells (RBC) was determined as in Fig. 1. Quantification of blood cells conducted as in  
988 Fig. 1A-E showed that CF were less sensitive to PHZ treatment than SF. Error bars:  
989 SD. Asterisks: p<0.05. N=10 Statistical analysis by two-way ANOVA. (C). PHZ  
990 ablation of red blood cells has more severe effects on SF than CF development,  
991 inducing edemas (white arrowhead), swollen notochords and bent tails. Scale bar is  
992 200 μm.; magnification is the same in the top four frames. Scale bar is 200 μm in  
993 bottom frame. (D). PHZ has larger effects on SF than CF tail development. N = 10.  
994 Asterisks: p<0.05. Statistical analysis by two-way ANOVA and Tukey HSD pairwise  
995 comparisons, whiskers are 5%, line is mean, dot is outlier.

996

997 **Figure 4. Expression changes in hypoxia related and metabolic genes in**  
998 **surface fish and cavefish embryos exposed to emulated cave-like hypoxic**

999 **environments.** (A). Hypoxic cave environments were emulated by placing embryos  
1000 in 60 cm long inert plastic tubes filled with water of approximately 50% oxygen  
1001 content. Left: Tube emulating hypoxic cave-like environment. Scale bar: 5 cm.

1002 Right: Magnified region of tube showing embryos (arrow heads). (B). Comparison  
1003 of hypoxia and metabolic gene expression by qPCR in cavefish (CF) and surface fish  
1004 (SF) embryos exposed to emulated hypoxic versus normoxic conditions.

1005 Upregulation of (a) *hif1a* hypoxia related gene, (b) *pdk1* and *pdk2* gene markers of  
1006 the TCA cycle, (c) *hk1* and *pfkma* gene markers of glycolysis, and (d) *ldha*, *ldhb*, and  
1007 *mct1* marker genes of fermentation by hypoxia in CF compared to downregulation  
1008 of all these genes in SF embryos by hypoxia. N = 3. Statistical analysis by two tailed  
1009 Student's t-tests with Bonferroni adjustment, Asterisks: p<sub>adjusted</sub> < 0.0063. Error  
1010 bars: range of fold changes.

1011

1012

1013

1014

1015 **Table 1: Primer sequences used for gene expression analysis with qPCR**

1016

1017

|        |                      |                        |                             |                                  |
|--------|----------------------|------------------------|-----------------------------|----------------------------------|
| Rpl13a | GeneID:<br>103025160 | ENSAMXG<br>00000033532 | caagtactgctgggcccaa<br>ag   | aggaaagccaggtacttca<br>atttgtt   |
| Gfi1aa | GeneID:<br>103029320 | ENSAMXG<br>00000006669 | agtgtgtgatcgacctt<br>aga    | ggacattcttcattgtctggt<br>gacg    |
| Hbbe2* |                      | ENSAMXG<br>00005017210 | taaatccctctgcagggtc<br>tgat | cctgatcacctccgtagtag<br>ccataata |
| Hif1al | GeneID:<br>103027586 | ENSAMXG<br>00000008564 | tgctcacctgcttctaact<br>t    | agctgtattctctctggctt<br>ga       |
| Hk1    | GeneID:<br>103028521 | ENSAMXG<br>00000012670 | ctcaatcgggtgaaggaca<br>acaa | agccctcgagaatactgtg<br>gat       |
| Pfkma  | GeneID:<br>103038352 | ENSAMXG<br>00000012908 | aggaggtgatgctcaagga<br>atga | agccctcgtaacgaagaa<br>ga         |
| Ldha   | GeneID:<br>103047177 | ENSAMXG<br>00000032467 | tgtggtgtccaaccagttg<br>ata  | agccctcgtaacgaagaa<br>ga         |
| Ldhb   | GeneID:<br>103033414 | ENSAMXG<br>00000007636 | atcgtggctgacaaggact<br>act  | tcctctgcacaaggtgagt<br>ct        |
| Mct1   | GeneID:<br>103033445 | ENSAMXG<br>00000000023 | ttctctcgagacgctgatg<br>ga   | gtacctatcgttaatgcac<br>ccagtag   |
| Pdk1   | GeneID:<br>103033744 | ENSAMXG<br>00000039808 | tcctcaaccagcacactctt<br>ct  | agtgacacgacagtgagga<br>taa       |
| Pdk2   | GeneID:<br>103046317 | ENSAMXG<br>00000010438 | agatggtgcagagctggta<br>t    | aacaacatcgttgtgctggt<br>ttct     |

1018

1019

1020

1021

1022

\*blasts to Pachon cavefish genome but also cloned from surface fish in this study

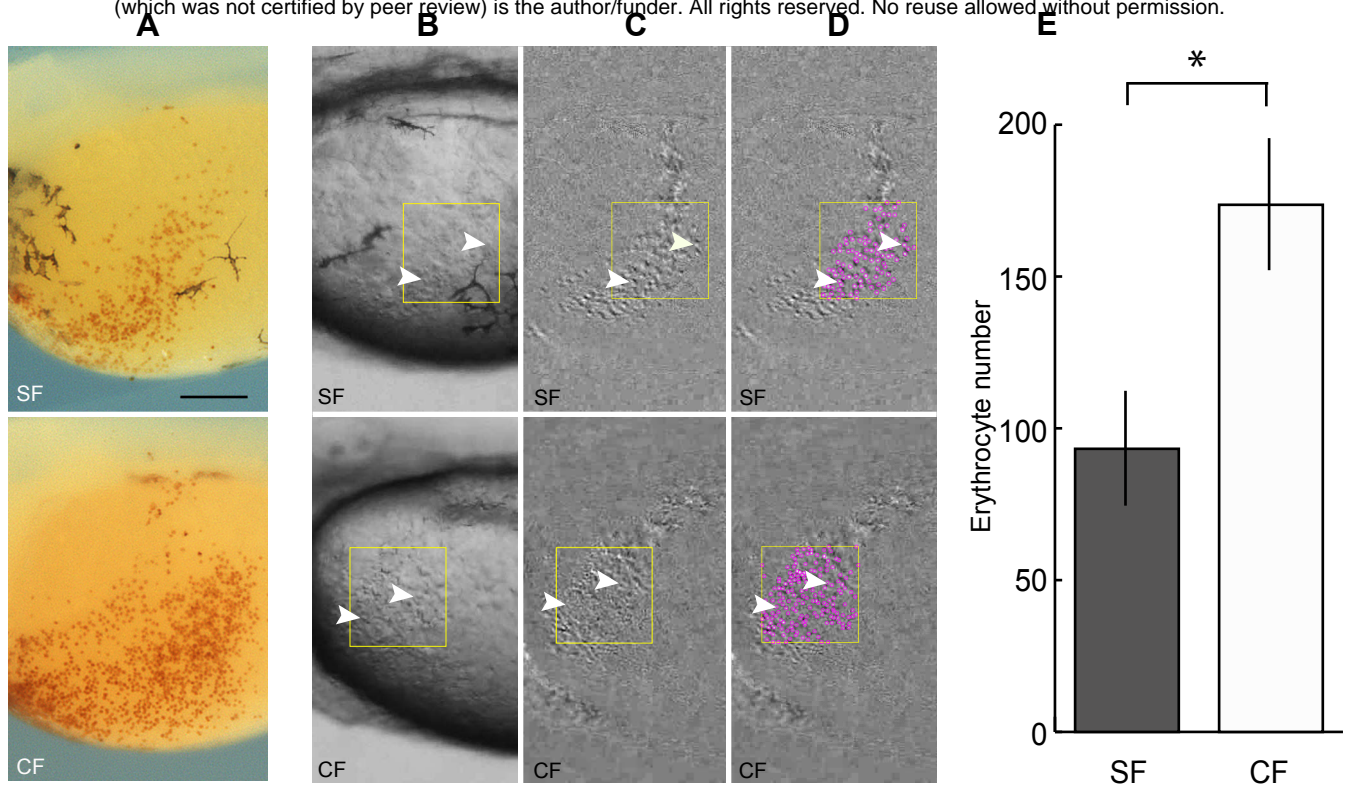

## HBB2

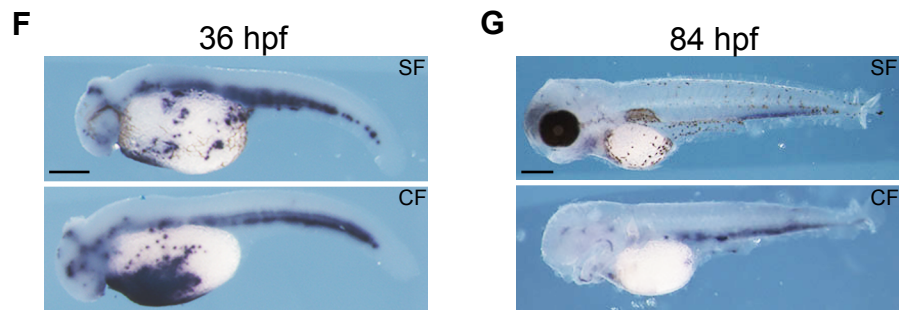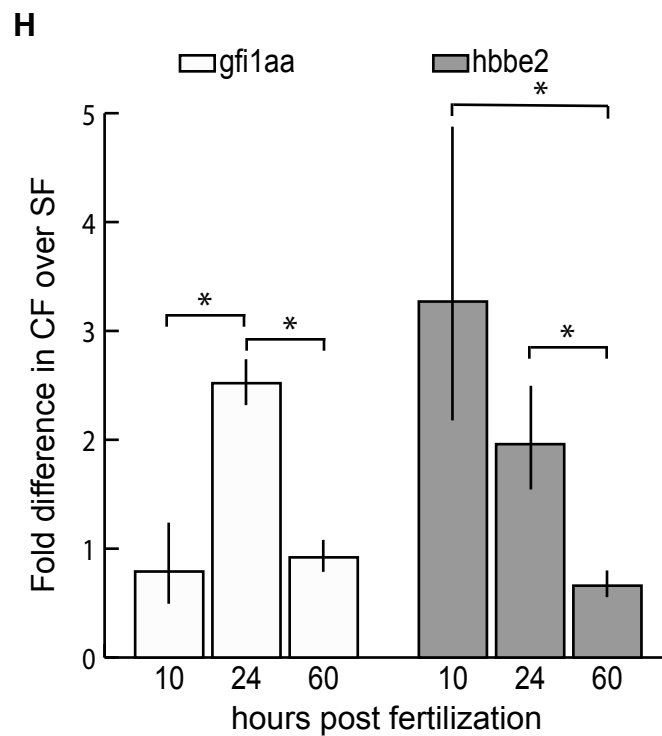

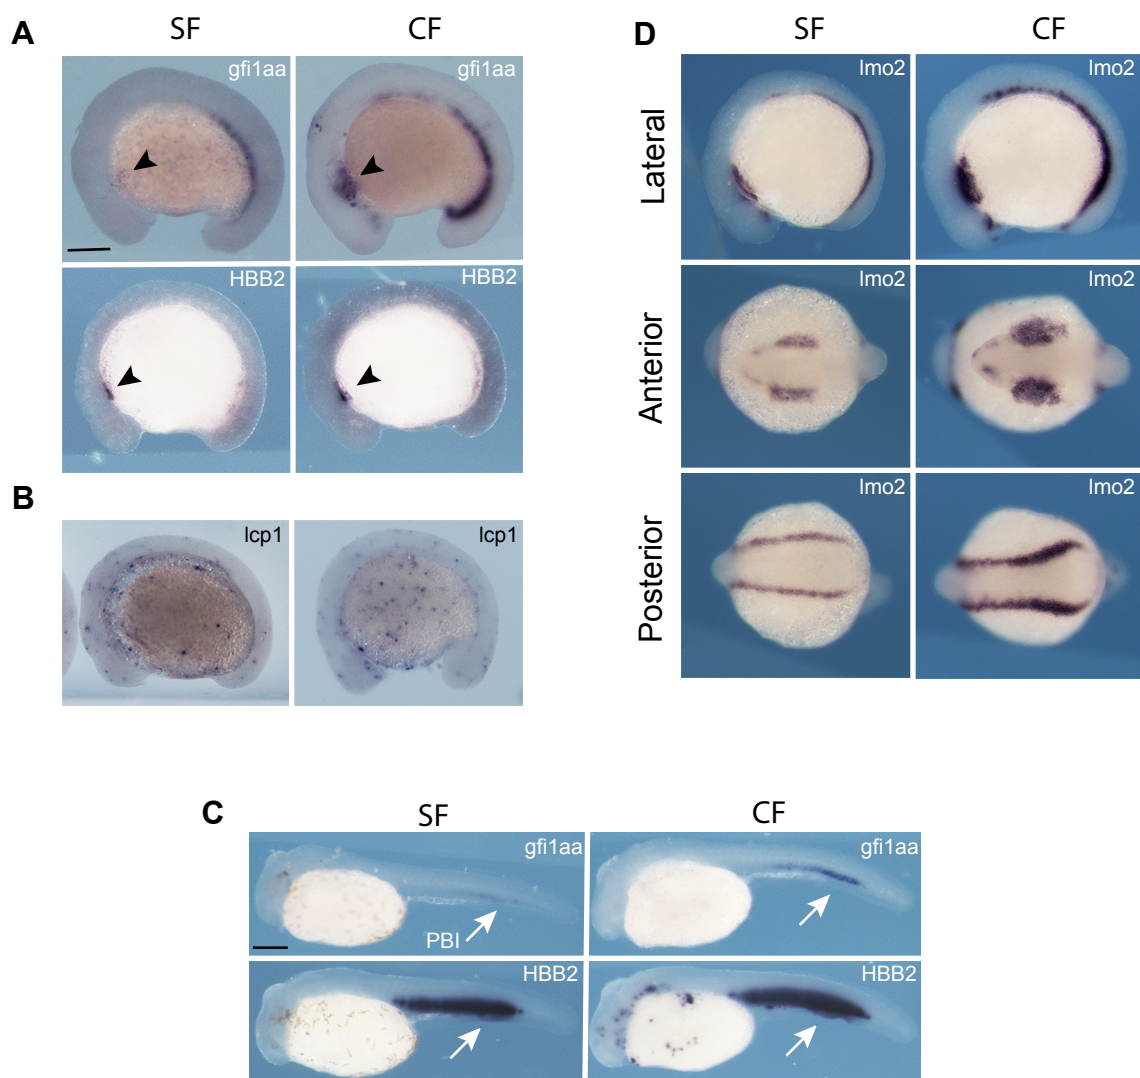

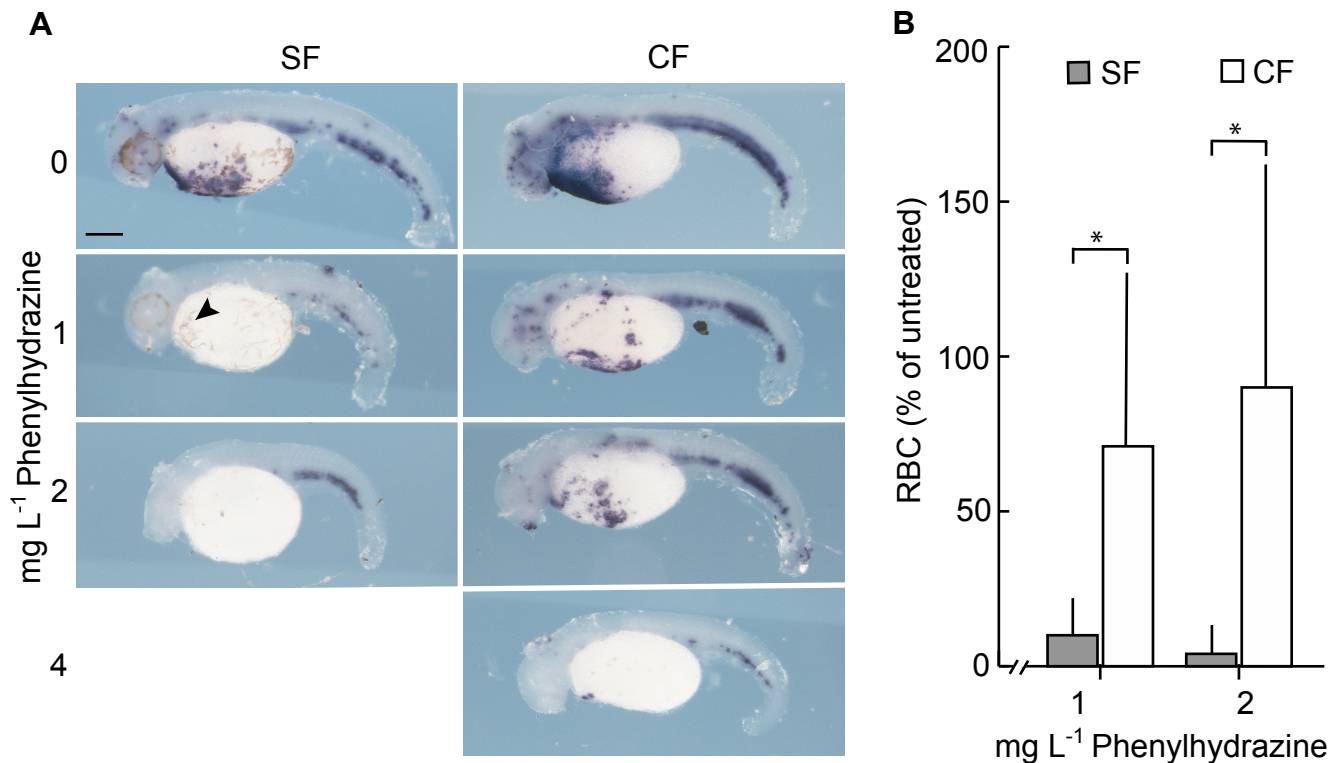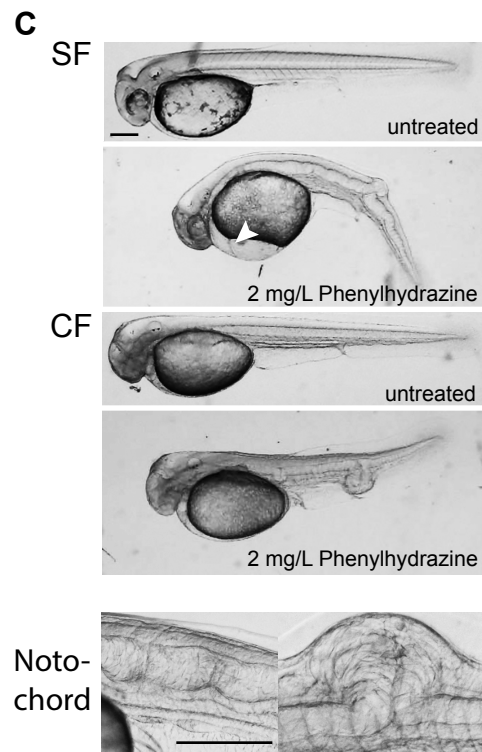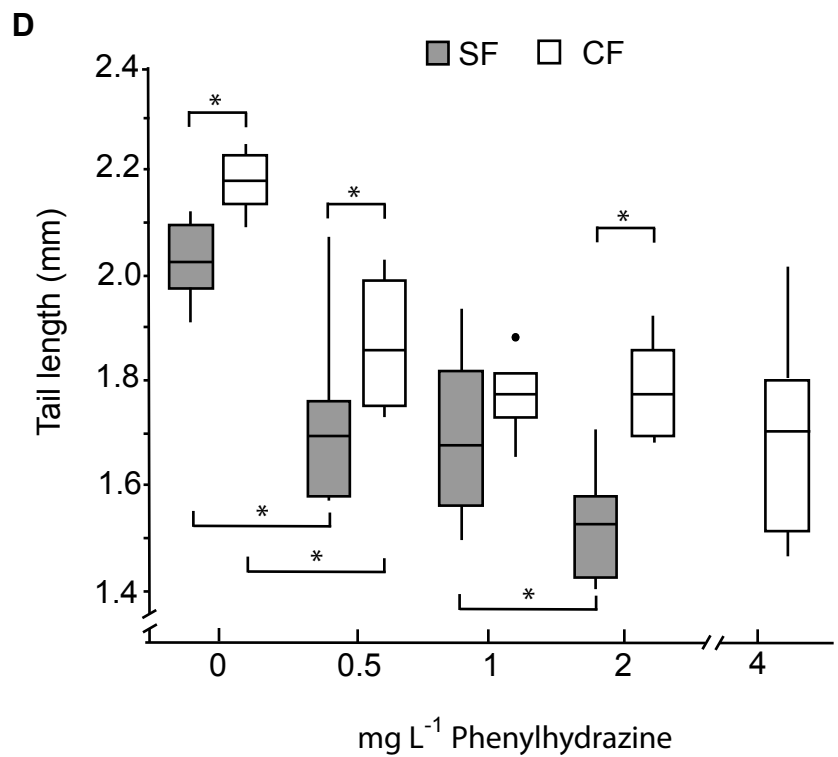

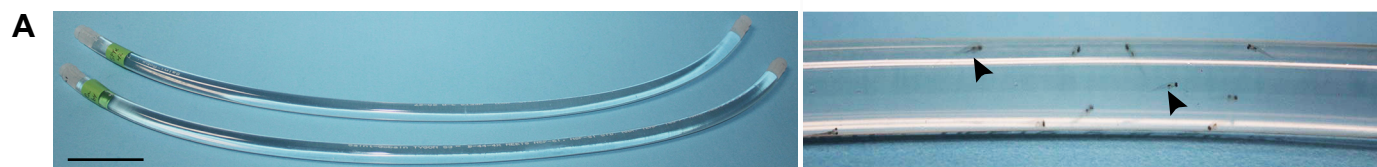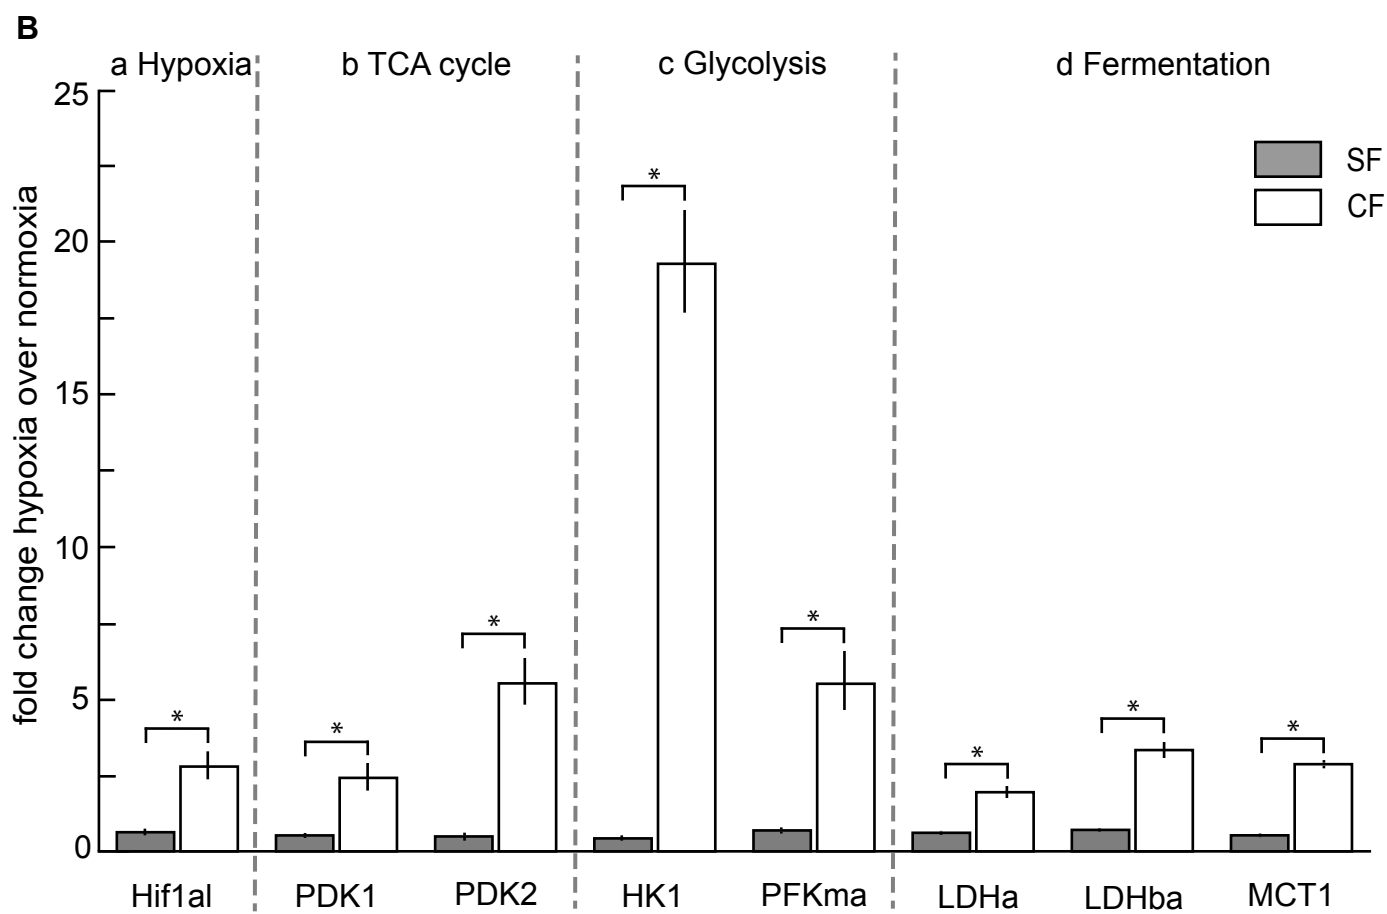

Source: https://www.biorxiv.org/content/10.1101/2019.12.12.874230v1.full.pdf
